# Supplementary material for: Effects of Orally Administered Resveratrol on TNF, IL-1β, Leukocyte Phagocytic Activity and Oxidative Burst Function in Horses: A Prospective, Randomized, Double-Blinded, Placebo-Controlled Study
Source: MDPI journal article supplement (doi:10.3390/ijms21041453), 2020-02-20
Supplement: s1 [file s1]

Table S1: Placebo and resveratrol capsule composition

|                        | Placebo capsule | Active resveratrol capsule |
|------------------------|-----------------|----------------------------|
| Biotin (10 mg)         | ●               | ●                          |
| Atlantic Kelp (50 mg)  | ●               | ●                          |
| Flaxseed Oil (300 mg)  | ●               | ●                          |
| Lecithin (40 mg)       | ●               | ●                          |
| Peppermint Oil (25 mg) | ●               | ●                          |
| Resveratrol (450 mg)   | ○               | ●                          |
